# Supplementary material for: miR-181a/b-1 controls thymic selection of Treg cells and tunes their suppressive capacity
Source: PLoS Biol. 2019 Mar 11;17(3):e2006716. doi: 10.1371/journal.pbio.2006716 (PMC6428341; doi:10.1371/journal.pbio.2006716)
Supplement: S1 Data — (XLSX) [file pbio.2006716.s007.xlsx]

## Sheet: Fig 1
1A %	het (+/-)	ko (-/-)		1A cell number	het (+/-)	ko (-/-)		1B	het/wt	ko/wt
	0.529	0.15			113814	21703			1.18025	0.320755
	0.844	0.335			97438	56648			0.912863	0.279601
	1.31	0.246			113596	2335			0.7397	0.578778
	0.792	0.112			57141	60858			0.590803	0.0899733
	0.977	0.35			141247	38335			2.22559	0.6307
	1.11	0.377			3743	3883			0.8925	0.0921435
	0.906	0.286			6771	789			0.291104	0.152245
	1.16	0.456			6177	5705			0.695361	0.166654
	0.00564	0.0594			83969	6677			1.78622	0.12932
	1.07	0.00195			88877	50600			1.26779	0.235756
	0.744	0.278			56592	28942			0.140085	1.01241
	0.952	0.303				36829			0.95725	0.3401
	0.675	0				13854			1.15329	0.265761
	1.1	0.196								0.260454
	1.54	0.395								1.05544
	1.08	0.421								1.27573
	0	0.325
	1.26	0.497
	1.21	0.51
	1.18	0.347
	0.475	0.527
1C %	day 14						day 28
	Ia		Ib		Treg		Ia		Ib		Treg
	het (+/-)	ko (-/-)	het (+/-)	ko (-/-)	het (+/-)	ko (-/-)	het (+/-)	ko (-/-)	het (+/-)	ko (-/-)	het (+/-)	ko (-/-)
	0.91	0.4	1.1	1.02	0.81	0.29	0.83	0.36	1.33	2.49	4.15	3.16
	0.53	0.61	1.44	1.51	0.73	0.29	0.95	0.58	1.04	1.97	4.21	2.94
	0.43	0.4	0.88	1.2	0.73	0.28	0.82	0.66	1.13	2.01	3.83	2.94
	0.52	0.41	1.23	0.67	0.97	0.32	0.9	0.5	1.02	2.58	4.57	2.58
	0.57	0.56	0.93	1.33	0.94	0.7	0.84	0.54	0.96	1.97	4.66	2.84
	0.55	0.61	1.06	1.09	0.86	0.36	0.97	0.63	0.99	2	4.75	2.89
		0.55		1.05		0.37		0.61		1.82		2.24
		0.51		0.76		0.27
		0.44		1.02		0.39
1D % 1a	het (+/-)			ko (-/-)
1	0.02573	0.0285	0	0.07536	0	0	0.04933
2	0.05774	0.10947	0.01805	0.01822	0.00481	0.04152	0.00483
3	0.24355	0.26822	0.07974	0.04919	0.02448	0.034	0.03731
4	0.51512	0.76643	0.68848	0.2981	0.12277	0.14609	0.30161
5	1.46825	2.02937	2.06123	1.55149	0.89104	0.80039	1.65729
1D % 1b	het (+/-)			ko (-/-)
1	2.79612	1.5674	1.70006	5.95328	7.23555	7.1736	7.89344
2	0.30314	0.35415	0.39249	0.76531	0.77903	1.03808	1.49095
3	0.14899	0.23151	0.34413	0.17361	0.17579	0.2356	0.57718
4	0.09467	0.16697	0.39592	0.11062	0.09422	0.12584	0.34623
5	0.06079	0.08456	0.20373	0.07684	0.05634	0.0583	0.22284
1D % Treg	het (+/-)			ko (-/-)
1	0.00858	0.0285	0	0	0.03932	0	0
2	0.00866	0.02576	0.00451	0.01215	0	0.01186	0
3	0.0659	0.048	0.03357	0.00579	0.00223	0.00243	0.01317
4	0.24225	0.17518	0.16695	0.03937	0.01285	0.02748	0.03232
5	0.78556	0.65866	0.29647	0.39885	0.18533	0.19852	0.1205

## Sheet: Fig 2
2A % Nur77+	unstim		CD3/CD28			2B MFI CD5	DP		CD8aSP		CD4 SP			2C Nur77 MFI Thy	het (+/-)	ko (-/-)
	het (+/-)	ko (-/-)	het (+/-)	ko (-/-)			het (+/-)	ko (-/-)	het (+/-)	ko (-/-)	het (+/-)	ko (-/-)			209	209
	1.36	0.396	8.6	3.52			2205	2599	4888	3955	11552	9781			171.2	181.7
	2	0.662	11.2	3.83			2479	2406	4718	3797	12553	9703			158.3	195
	2.06	0.805	12.2	4.13			2161	2537	4399	4083	11028	9726			209.4	220.4
	1.46	1.3	9.2	4.19			2400	2505	4782	4157	11656	8890			217.6	220.4
	2.13	1.02	12.3	5.59			2261	2697	4663	4357	11236	10143
	2.09	1.44	17.3	14.8			2253	2683	4439	4205	11260	10584
	2.05	1.44	8.1	6.2			2282	2423	4592	3794	11531	9606
	1.73	0.918	7.14	5.42			2301	2634	4270	3849	10903	9685
								2432		3976		9863
2D % of Foxp3+	CTRL		Nur77 (Nr4a2)			2E	Va2+Vb5+				Va2+Vb5+Foxp3+
	het (+/-)	ko (-/-)	het (+/-)	ko (-/-)			WT		RIPmOVA		WT		RIPmOVA
	1.01	0.55	0.388	2.29			het (+/-)	ko (-/-)	het (+/-)	ko (-/-)	het (+/-)	ko (-/-)	het (+/-)	ko (-/-)
	0.69	0.5	0.227	1.84			14.6	13.3	7.07	10.8	0.16	0.05	10.6	0.084
	0.63		0.324				5.99	9.18	5.21	8.68	0.15	0.099	1.44	4.9
							9.66	10.8	3.35	11.3	0.075	0	0.23	0.26
							11.9	9.64	3.94	8.73	0.084	0.13	1.77	0.14
							7.41	14.2	1.28	11.6	0.079	0.071	1.22	0.64
							7.75	7.11	3.97	3.04	0.11	0	0.55	0.51
							7.72	10.8	8.56	7.16	0	0.07	0.15	0.091
							4.87	14.9	10.4	10.8	0.15	0.1	0.59	0.15
							9.35	11	8.46	12.3	0.099	0.039	1.68	0.093
							12.3	11.5	5.05	9.24	0.081	0.047	1.68	0.44
							10.6	13		14.6		0		0.072
										14.4				0.1
										14.4				0

## Sheet: Fig 3
3A %	het (+/-)	ko (-/-)		3A cell number	het (+/-)	ko (-/-)		3B	het/wt	ko/wt		3C MFI	th		scLN		mLN		spl
	21.1	12.7			1013855	259692			0.646943	0.296667			het (+/-)	ko (-/-)	het (+/-)	ko (-/-)	het (+/-)	ko (-/-)	het (+/-)	ko (-/-)
	21.7	20.3			1728405	1213104			0.820454	0.25463			c	440	73.9	75.3	62.6	78	c	80.2
	18.9	16.8			1655262	70863			0.990172	0.402724			328	371	70.6	72.3	63.8	78.2	77.2	76.9
	17.7	16.1			1227600	2227316			1.1947	0.366881			484	586	58	70.2	62.2	76.4	64.5	75.6
	22.4	20.4			659502	3034080			1.03895	0.218271			503	611	74.2	74.6	67.7	77.4	61.4	76.6
	17.4	27.5			3224704	3427325			0.752194	0.282668			462	505	70.5	75.7	67	75.8	73.2	72.1
	19.8	15.2			2350131	545126			1.46752	0.376688
	19	24.5			759616	1977976			0.359593	0.242388
	18.3	25.5			1617660	2315250			1.18704	0.487323
	22.7	20.4			1.40881e+06	1.17572e+06			1.05314	0.280231
	16.6	26.8			2201616	846745			1.44303	0.810862
	19.8	14.5			1.65e+06	1.0735e+06			0.96732	0.345622
	20	13.7			1.17985e+06	1.18289e+06			0.536502	0.517328
	17.5	18.5			2.11191e+06	1.2895e+06				0.61931
	18.6	19.2			1.07273e+06	1.2706e+06				0.989723
	29.5	18.3			1.9793e+06	1.69977e+06
	16.4					2.91252e+06
	16.4
	19.6
	15.8
	17.2
	16.8
	18.6
3D spleen	CDR3		ENS				3E thymus	CDR3		ENS
	het (+/-)	ko (-/-)	het (+/-)	ko (-/-)				het (+/-)	ko (-/-)	het (+/-)	ko (-/-)
	1860	1413	1996.13	1428.09				2540	2668	3050.94	3114.5
	1581	1414	2316.21	2043.33				2761	2776	3309.93	3269.12
	1515	1235	2024.13	1685.15				522	382	947.15	909.946
	1462	1257	2137.64	1735.05				974	910	1657.21	1652.39

## Sheet: Fig 4
4A	thymus			spleen			4D MFI	th		scLN		mLN		spl
	DP	CD4+Tconv	Treg	CD4+Tconv	Treg			het (+/-)	ko (-/-)	het (+/-)	ko (-/-)	het (+/-)	ko (-/-)	het (+/-)	ko (-/-)
	122.341	67.4337	22.673	3.48589	1.54948			158	409	168	542	181	624	145	430
	118.805			3.75236	1.66874			142	414	228	411	175	482	189	447
								162	422	216	489	196	479	166	419
								163	375	216	447	223	580	177	425
								166	371	222	423	194	523	198	411

## Sheet: Fig 5
5A CTLA-4 AU	het (+/-)	ko (-/-)					5E	0		5 min		30 min		60 min		120 min		180 min
	47.8997	60.9114						het (+/-)	ko (-/-)	het (+/-)	ko (-/-)	het (+/-)	ko (-/-)	het (+/-)	ko (-/-)	het (+/-)	ko (-/-)	het (+/-)	ko (-/-)
	16.8393	33.4612						1	1	0.948178	1.16233	1.08421	1.43316	1.26073	1.97656	2.03563	3.27865	2.62348	3.87413
	13.137	32.278						1	1	1.49007	1.48139	1.26551	1.37717	1.4206	1.75062	3.02233	3.47767	2.23945	2.52357
	36.75	39.3894						1	1	1.02079	1.11419	1.00808	1.32551	2.2679	2.44611	3.06005	3.49306	3.3545	3.9413
	31.0495	32.2359
	47.3055	37.9121
	45.1641	30.9206
	33.1129	49.186
	51.9181	29.7545
	41.9328	53.6202
	29.5882	20.0099
	30.8123	86.7159
	25.044	44.8619
	41.035	35.589
	34.1213	27.6209
	27.5345	32.2741
	36.0817	60.4776
	15.5666	31.2865
	7.9223	42.5004					5F CTLA-4 MFI paired data	thymus		spleen		LN
	8.18509	41.1998						het (+/-)	ko (-/-)	het (+/-)	ko (-/-)	het (+/-)	ko (-/-)
	5.956	32.3849						903.97	1155.74	896.285	1350.17	1006.24	1414.24
	15.2085	23.3842						1025.94	1423.66	1048.32	1380.28	1209.89	1514.89
	19.0592	28.1613						965.984	929.438	858.898	1163.31	1032.6	1423.66
	25.8369							1010.59	1150.72	993.338	1183.77	1121.1	1286.39
	23.6552							1041.55	1283.57	1163.31	1356.13	1272.36	1736.19
								873.648	1039.31	826.674	1140.75	1025.94	1294.89
5D			CHX					1032.6	1170.94	837.269	1207.25	1050.59	1426.81
	het (+/-)	ko (-/-)	het (+/-)	ko (-/-)				1314.97	1101.81	1155.74	1194.14	1401.79	1525.03
	10.044	5.34	1.245	10.099				978.507	1145.73	849.814	1123.54	1118.67	1576.85
	4.731	2.684	1.909	2.324				1046.06	1143.24	1052.86	1135.81	1559.37	1634.22
	5.894	0.719	1.245	1.937				955.68	1111.41	884.889	1104.2	1280.76	1612.45
	13.254	2.214	1.771	3.044				961.848	1143.24	886.778	1066.6	1160.78	1380.28
	9.518	3.569	1.024	0.47				945.494	1158.26	879.249	1223.18	1128.43	1465.25
	4.51	10.404	1.273	1.079				1025.94	1138.28	1113.82	1239.34	1280.76	1508.17
	2.214	5.368	0.747	0.194				1068.91	1225.86	1368.15	1250.24	2123.56	1626.93
	2.131	2.518	1.909	2.795				929.438	1043.8	1066.6	1078.2	1552.43	1545.53
	1.66	1.383	1.411	5.451				902.042	1021.53	1023.73	1173.49	1518.26	1468.51
	2.131	2.048	6.392	2.878
	2.739	3.597	1.992	2.214
	1.715	3.846	1.439	3.265
	4.51	1.549	6.226	2.214
	2.629	1.411	2.352	1.826
	6.032	1.66	2.02	6.419			5G Nur77 MFI Spl	het (+/-)	ko (-/-)
	2.214	3.625	1.411	11.372				162.3	181.7
	2.795	2.269	0.747	1.079				154.4	144.2
	4.04	1.799	1.743	7				132.3	130
	8.688	3.459	3.376	3.154				177.8	184.2
	7.471	5.063	3.376	6.502				158.2	175.1
	2.878	4.704	3.68	7.166
	3.099	9.435	2.933	2.407
	3.901	12.673	1.328	2.822
	2.988	1.992	0.747	2.048
	4.482	2.103	0.858	0.664
	3.459	4.482	0.636	4.289
	4.178	3.625	0.526	0.941
	3.486	4.565	3.901	2.407
	6.06	1.577	1.66	0.747
	11.925	2.214	1.439	0.636
	5.257	3.154	2.02	1.051
	7.913	2.739	0.913	0.719
	4.787	2.269	1.024	1.051
	4.233	1.937	0.913	0.83
	2.601	1.217	3.071	0.719
	4.399	1.854	4.289	0.221
	0.692	2.103	2.656	2.048
	2.297	1.577	1.522	2.241
	5.202	12.064	1.743	2.49
	1.743	8.19	2.38	7.775
	0.664	7.72	1.577	0.885
	0.996	5.312	1.217	3.542
	5.202	3.652	0.968	1.3
	3.459	5.063	2.158	3.514
	2.38	8.633	1.024	5.562
	1.134	13.696	1.162	0.996
	4.012	2.767	0.996	3.708
	1.522	3.652	0.941	2.85
	5.783	12.507	4.316	1.162
	0.858	3.348	1.466	4.427
	0.581	5.811	3.348	5.063
	9.159	5.368	1.051	1.688
	2.02	6.862	1.715	2.463
	6.336	6.668	2.02	0.968
	1.3	4.87	4.87	1.356
	1.3	10.265	2.656	1.383
	2.297	3.486	1.439	3.293
	3.486	10.736	2.656	1.66
	0.609	10.819	1.439	1.024
	0.747	11.317	5.562	1.383
	3.376	5.451	1.134	1.494
	5.34	13.586	1.328	1.439
	2.85	2.463	2.933	3.32
	11.538	5.645	2.38	2.463
	10.376	1.937	3.846	1.66
	3.044	3.127	1.632	2.352
	5.811	8.826	2.878	1.134
	1.66	8.743	2.933	2.878
	1.024	7.028	0.996	4.897
	4.012	13.613	0.968	2.241
	2.186	1.909	1.411	3.071
	3.376	2.463	7.332	1.051
	3.016	12.977	7.056	3.569
	2.186	13.53	1.107	3.32
	1.107	11.151	0.387	1.909
	1.826	10.487	0.968	2.601
	1.079	7.996	3.874	0.332
	6.475	7.941	4.455	0.609
	3.846	6.807	1.965	2.656
	4.012	5.977	0.47	3.984
	1.605	6.06	0.636	2.546
	5.866	9.574	1.024	3.348
	1.051	16.546	2.103	2.601
	1.217	9.297	9.297	0.636
	0.47	3.708	9.103	0.885
	1.632	4.012	0.858	1.3
	2.573	2.878	2.214	1.3
	0.443	6.668	0.498	3.265
	0.415	4.344	2.712	3.569
	0.747	14.997	5.063	3.237
	0.332	8.937	3.708	0.802
	6.724	8.384	2.739	4.538
	2.214	8.301	0.885	1.882
	2.269	3.984	1.771	4.565
	1.965	2.712	3.459	2.269
	7.913	2.795	0.636	0.913
	5.7	1.328	0.387	0.498
	5.562	2.103	3.265	1.217
	4.593	8.162	2.933	7.443
	4.621	3.099	0.802	2.905
	3.237	2.546	7.249	3.984
	2.795	13.447	1.577	3.376
	1.937	12.119	3.293	3.099
	3.237	2.905	5.063	3.68
	2.629	4.51	9.601	3.597
	1.937	5.423	6.751	2.712
	1.965	2.49	4.289	2.49
	2.214	3.763	4.51	2.85
	5.091	6.613	3.929	2.822
	1.992	3.984	3.348	2.822
	1.937	3.763	6.641	2.988
	2.656	4.51	1.688	3.652
	1.19	1.024	2.961	3.763
	1.826	5.423	5.783	2.795
	3.099	7.803	2.214	3.237
	2.961	3.791	3.431	3.21
	5.423	2.767	2.131	4.455
	3.016	2.712	6.53	1.826
	7.194	6.336	4.289	5.811
	5.229	8.079	7.941	1.522
	0.885	3.459	6.502	3.376
	1.162	2.131	2.131	5.119
	9.048	7.471	3.957	6.807
	0.415	6.253	2.739	5.728
	0.304	13.171	2.075	3.071
	1.937	2.822	3.265	6.309
	2.186	2.767	3.763	5.7
	3.597	0.692	3.597	3.735
	3.542	3.237	0.526	1.66
	4.842	5.7	4.233	0.636
	3.044	0.996	1.466	0.553
	1.66	1.411	6.087
	1.522	1.743	2.795
	2.905	12.036	1.079
	1.383	11.344	2.961
	8.107	2.214	1.522
	3.348	6.973	0.332
	3.099	7.056	3.376
	2.518	3.431	5.202
	3.569	12.866	1.965
	3.071	7.056	1.051
	3.763	3.431	2.822
	2.435	12.756	2.878
	2.269	3.459	1.024
	2.988	2.49	0.858
	1.19	4.953	0.747
	1.605	4.095	0.692
	2.214	2.822	1.992
	3.597	2.075	1.024
	2.85	1.383	0.36
	1.466	1.134	2.324
	3.791	2.214	2.324
	2.518	6.973
	2.241
	2.075
	2.85
	3.763
	3.625

## Sheet: Fig 6
6A	TNFa					IL-4					IL-2
	CD4+		Treg			CD4+		Treg			CD4+		Treg
	het (+/-)	ko (-/-)	het (+/-)	ko (-/-)		het (+/-)	ko (-/-)	het (+/-)	ko (-/-)		het (+/-)	ko (-/-)	het (+/-)	ko (-/-)
	63.1	53.4	27.7	24.1		1.5	0.6	2.6	2.2		25.3	24.3	8.5	7.3
	67.6	56.6	31.7	24.1		1.1	0.5	1.7	2.2		28.5	22.8	6.6	8.3
	62.7	53.7	27.5	20.3		1	0.6	2	1.9		28.7	23.9	6.7	7
	62.2	51	26.4	19.9		1	0.4	2.1	1.8		24.2	22.5	5.3	7.8
	69.55	48.63	38.62	26.46		1.9	0.2	1.2	1.6		30.4	19.7	13.2	13.9
	69.51	64.42	30.97	29.62		1.9	0.3	1.5	1.7		30.7	15.9	13.8	11
	66.26	48.23	32.31	26.26		1.2	0.2	1.6	1.5		22.3	13.5	14.4	11.5
	IFNg					IL-17					IL-10
	CD4+		Treg			CD4+		Treg			CD4+		Treg
	het (+/-)	ko (-/-)	het (+/-)	ko (-/-)		het (+/-)	ko (-/-)	het (+/-)	ko (-/-)		het (+/-)	ko (-/-)	het (+/-)	ko (-/-)
	8.04	6.7	4.64	4.57		0.6	0.5	1.6	1.5		0.7	0.9	5	4.2
	5.79	5.54	4.38	3.82		0.6	0.5	1.6	1.6		0.9	0.8	4.4	4.5
	7.85	8.49	4.26	4.71		0.6	0.4	1.7	1.5		1	0.7	5.2	3.3
	7.58	7.87	4.12	4.1		0.6	0.4	1.5	1.8		0.9	0.9	3.8	4.6
	7.14	7.61	5.02	7.23		0.5	0.4	0.8	1.3		0.4	0.7	3.8	6.1
	7.52	7.86	4.71	7.62		0.6	0.4	0.6	1.1		0.7	0.5	4.7	5
	8.35	7.5	5.48	6.9		0.9	0.6	1.9	1.7		0.5	0.2	4.4	3.6
6C	% of CD45.1				# CD45.1x10^6			# Tregx10^6
	no	Treg (+/-)	Treg (-/-)		Treg (+/-)	Treg (-/-)		Treg (+/-)	Treg (-/-)
	98.01	71.26	38.5		0.217885	0.130085		0.0806289	0.18043
	97.77	76.43	28.42		2.14004	0.157282		0.56252	0.33421
	99.12	59.43	39.24		0.189797	0.0977873		0.124168	0.138781
	98.84	75.06	53.7		1.25032	0.152723		0.366467	0.120813
	98.34	66.64	45.59		0.216724	0.19319		0.103907	0.21548
	96.7	62	43.94		0.255486	0.172424		0.155393	0.21759
	98.59	45.71	76.84		0.322286	1.38197		0.380736	0.410957
	97.97	75.48	42.65		0.300807	0.178083		0.0960846	0.237875
	95.24	74.87	47.63		2.46364	0.220991		0.821651	0.22809
	99.16	75.13	42.76		0.903964	0.174228		0.297672	0.230009

## Sheet: Fig S1
S1A	DN het/wt	DN ko/wt	DP het/wt	DP ko/wt	CD4SP het/wt	CD4SP ko/wt			S1B	DP		CD8aSP		CD4SP
	0.74	3.21	0.5	1.9	0.5	1.71				het (+/-)	ko (-/-)	het (+/-)	ko (-/-)	het (+/-)	ko (-/-)
	1.06	1.74	0.9	0.5	0.83	0.6				81.2081	74.4755	0.42	0.278846	0.454474	0.916783
	0.09	5.59	0	2.6	0.04	2.55				83.4	72.3005	0.76	0.206925	0.85	0.366197
	1.79	0.94	1.7	0.5	1.39	0.5				65.4	73.5123	0.78	0.207351	0.37	0.577946
	0.33	2.08	0.2	2.4	0.32	2.86				84.1	59.6	0.12	0.71	0.98	0.91
	0.94	3.67	0.64	0.36	0.97	0.4				82.2	77.2	0.21	0.65	0.39	0.82
	1.75	0.64	1.16	0.19	1.09	0.34				86.9	69.5	0.23	0.64	0.41	0.77
	1.05	0.78	0.6	0.81	0.65	1.04				83.2	72.4	0.19	0.53	0.8	0.51
	1.3	2.66	0.96	0.7	1.03	0.7				80.4	72.5	0.32	0.47	0.75	0.57
	1.52	1.34	0.94	0.66	0.91	0.71					72.5		0.35		0.72
	1.84	1.34	1.16	0.56	1.26	0.85					73.6		0.25		1.62
	2.99	2.37	1.73	1.57	1.87	1.05					78		0.37		1.22
		3.14		3.73		3.29					75.2		0.28		0.95
		5.91		0.46		0.72					71		0.33		0.87
		1.7		1.29		1.26
		6.19		0.66		0.74
		3.87		0.7		0.83
		2.08		2.01		2.45
S1C	day 7								S1D	CD4+SP		CD4+CD69+TCRb+		CD4+CD69loTCRb+		post.sel.DP
	Ia		Ib		Treg					het (+/-)	ko (-/-)	het (+/-)	ko (-/-)	het (+/-)	ko (-/-)	het (+/-)	ko (-/-)
	het (+/-)	ko (-/-)	het (+/-)	ko (-/-)	het (+/-)	ko (-/-)				1.03	2.62	59.7	2.36	1.13	0.45	6.2	1.89
	1.35	0	1.15	1.77	1.84	1.96				0.81	0.57	4.71	11.9	0.097	1.63	1.2	1.54
	0.03	0.13	1.71	4.72	0.21	0.38				0.71	1.69	63.9	3.19	2.23	1.16	3.63	0.79
	0	0.24	4.86	2.08	0	1.35				1.01	0.64	37.2	5.91	10.7	1.39	2.69	0.96
	0.031	0.65	2.23	2.32	0.35	2.23					2.19		3.95		0.42		1
		0		4.5		1.5					0.81		21.2		0.8		2.07
		0.085		1.96		1.62					1.01		5.56		0.1		1.43
		0.24		1.21		0					1.05		6.65		0.1		1.61
		0				0.4

## Sheet: Fig S2
S2A	het (+/-)	ko (-/-)		S2B % RTE	het (+/-)	ko (-/-)		S2C	Spleen		pLN		mLN
	6.88	2.68			9.86902	5.52308			het (+/-)	ko (-/-)	het (+/-)	ko (-/-)	het (+/-)	ko (-/-)
	15.5	11.9			13.8773	5.41161			2.95	3.35	5.66	4.68	1.75	4.37
	22.5	3.86				5.33278			3.83	3.27	4.07	5.28	3.17	3.65
	18	2.91							2.38	3.69	4.22	5.43	2.18	2.38
	14.1	20.2							2.47	2.76	2.94	4.27	3.28	3.49
	18.9	10.6							2.44	1.89	6.02	2.5	3.55	1.21
	17	6.65							3.39	2.4	4.56	3.77	3	1.68
	19.5	15.4							3.96	2.89		4.53	3.77	1.35
	0.0999	0.704
	26.5	0.0351
	27.4	25
	23.6	19.3
	22.2	0.0674
	36.5	14
	32.5	6.51
	40.9	23.5
	0	28.7
	33	22.9
	32.4	28.3
	32.9	23.6
	33.2	27

## Sheet: Fig S3
S3A	thymus										spleen
		het (+/-)				ko (-/-)						het (+/-)				ko (-/-)
	1	2540	2761	522	974	2668	2776	382	910		1	1860	1515	1581	1462	1413	1414	1235	1257
	2	741	752	182	541	764	791	126	497		2	663	728	788	636	616	720	659	610
	3	276	274	168	355	236	246	134	329		3	290	361	393	390	287	391	353	352
	4	117	104	129	194	103	88	134	184		4	161	191	202	210	128	190	178	188
	5	47	53	112	129	51	47	102	127		5	96	104	96	137	90	123	122	134
	6	26	20	88	65	23	19	88	74		6	71	82	95	80	65	68	83	90
	7	11	10	53	42	16	12	75	40		7	50	48	59	58	50	63	49	50
	8	11	11	41	30	13	7	49	26		8	29	35	35	53	44	39	33	35
	9	5	5	41	15	7	2	41	17		9	24	15	25	24	17	22	19	29
	10	6	2	27	9	1	8	36	19		10	22	20	19	27	19	20	15	16
	11	3	0	19	5	2	2	25	16		11	14	12	8	8	12	22	22	11
	12	5	2	18	6	2	1	28	11		12	7	11	10	20	15	10	13	13
	13	2	1	17	5	0	1	16	3		13	8	11	14	6	10	11	8	6
	14	3	0	14	2	0	0	12	5		14	4	8	3	9	10	6	6	6
	15	1	0	7	1	1	1	7	1		15	4	5	10	3	7	2	7	5
	16	1	0	6	1	2	0	10	1		16	6	5	5	4	4	5	8	2
	17	0	0	3	1	1	0	8	1		17	8	3	5	1	3	6	5	4
	18	0	0	5	0	0	0	7	0		18	5	2	1	4	5	4	3	7
	19	0	0	4	1	0	0	4	1		19	4	5	3	6	3	2	3	3
	20	0	0	1	1	0	0	3	0		20	5	3	1	2	2	3	1	5
	21	0	1	2	0	0	1	2	1		21	5	4	2	3	2	1	3	2
	22	0	0	2	0	1	0	1	0		22	5	2	3	2	3	2	2	4
	23	0	0	4	0	0	0	2	1		23	4	2	2	0	1	1	2	1
	24	0	0	3	0	1	0	2	0		24	1	3	0	1	1	1	1	2
	25	0	0	4	0	0	2	2	0		25	0	1	1	1	1	2	3	0
	26	0	0	1	0	0	0	1	0		26	1	2	0	1	1	1	1	4
	27	1	0	0	0	0	0	0	0		27	0	3	1	2	0	2	1	3
	28	0	0	1	0	0	0	0	0		28	1	0	0	0	1	0	2	0
	29	0	0	1	0	0	0	1	1		29	2	1	2	0	1	1	0	1
	30	0	0	0	0	0	1	0	1		30	2	1	0	0	1	1	0	0
	31		1	1				1			31		1			1			4
	36								1		32		2		2	2	2		1
	40								1		33				1	1	1	2	1
	45					1					34	1	1	1		1
	124			1							35	1	1					1	1
	202				1						36					1	1		3
											37					1			1
											38	1							2
											39					1
											40		2			2
											42					1		2
											44					2		1
											46	1						1
											47	1
											50							1
											52					1		1	1
											53					1
											54	1
											58			1	1
											60					1
											61								1
											62					1
											64					1			1
											65							1
											66	1
											70								1
											77					1		1
											84					1
											88							1
											96		1
											97	1
											99					1
											102							1
											134						1
											136					1
											144					1

## Sheet: Fig S4
S4A	CTLA-4		Helios		CD28		CD25		CD122		TGF-bR		GITR		CD27 %		CD103 %		CD127 %		KLGR1		PLZF		GATA3		Egr2		Irf4		c-Rel
	het (+/-)	ko (-/-)	het (+/-)	ko (-/-)	het (+/-)	ko (-/-)	het (+/-)	ko (-/-)	het (+/-)	ko (-/-)	het (+/-)	ko (-/-)	het (+/-)	ko (-/-)	het (+/-)	ko (-/-)	het (+/-)	ko (-/-)	het (+/-)	ko (-/-)	het (+/-)	ko (-/-)	het (+/-)	ko (-/-)	het (+/-)	ko (-/-)	het (+/-)	ko (-/-)	het (+/-)	ko (-/-)	het (+/-)	ko (-/-)
	158	409	366	440	970	250	4929	4249	104	101	17.7	13.8	5606	5998	92.2	93.9	10.9	14.6	9.8	11.1	2.87	1.89	10.9	10.8	1484	1900	1439	1121	1110	955	2136	2428
	142	414	328	371	303	231	4720	3430	104	102	15	27.8	6115	5592	90.3	92.7	11.3	15.7	12.6	16.5	3.12	4.71	5.82	9.76	1472	1981	1339	1104	828	836	1991	1751
	162	422	484	586	846	247	5056	3915	104	84.7	29.5	31.1	4888	5813	92.3	92.7	7.7	25.5	8.86	18.9	3.08	3.75	15.3	16.9	2250	1723	1230	1357	982	1036	2781	2006
	163	375	503	611	281	288	4795	4175	98.9	109	24.3	16.1	5771	6071	92.9	93.3	23.3	24.7	20	22	4.32	2.57	4.63	9.33	1932	1982	1348	1197	949	797	3118	2288
	166	371	462	505	315	281	5014	3868	98.2	97.6	19.2	25.1	6160	7022	91.2	93.4	15.9	25.5	20.2	33.6	3.67	2.52	5.7	4.67	2008	2088	1331	1186	891	891	2738	1968
													6673	6403	90.8	93.7	27.8	16.7	32.1	21.6	1.67	2.34	5.43	6.82	2020	1843	1251	980	961	866	3073	2065
													6013	6954	90	91.8	18	26.9	19.1	33.7	3.01	2.4	3.49	5.61	2016	1365	1260	873	909	756	2946	1834
													7760	6904	91.1	95.1	13.4	12.5	9.48	8.82		4.03		5.71		2016		1216		1079		2375
													8248	6870	93.3	96.3	13.3	13.8	7.36	9.05		2.39		6.76		2123		1246		961		2798
													7971	7591	93.4	90.9	14	29.5	9.77	22.2		3.06		7.01		2111		1299		913		2790
													7213	7301	93.4	93.1	16.6	25	9.42	8.22
													6988	8248	95.6	94	14.1	30.1	7.36	16.6
S4B	CTLA-4		Helios		CD28		CD25		CD122		TGF-bR		GITR		CD27 %		CD103 %		CD127%		KLGR1		PLZF		GATA3		Egr2		Irf4		c-Rel
	het (+/-)	ko (-/-)	het (+/-)	ko (-/-)	het (+/-)	ko (-/-)	het (+/-)	ko (-/-)	het (+/-)	ko (-/-)	het (+/-)	ko (-/-)	het (+/-)	ko (-/-)	het (+/-)	ko (-/-)	het (+/-)	ko (-/-)	het (+/-)	ko (-/-)	het (+/-)	ko (-/-)	het (+/-)	ko (-/-)	het (+/-)	ko (-/-)	het (+/-)	ko (-/-)	het (+/-)	ko (-/-)	het (+/-)	ko (-/-)
	145	430	60	80.2	715	599	2820	2613	93.2	102	29.9	65.2	3916	4029	83.4	77.4	8.26	6.41	29.4	22.4	8.43	11	7.24	7.14	683	411	35.8	14.8	1061	671	1346	657
	189	447	77.2	76.9	769	392	2655	2760	105	103	29.4	45.1	3691	3726	84.3	77.1	6.83	7.42	26.3	24.6	9.31	11.5	3.13	10.1	408	476	15	13	719	725	914	608
	166	419	64.5	75.6	676	454	2586	2452	84.7	90.2	31.7	38.7	3907	3407	87.6	83.5	6.53	9.42	27.4	31.5	10.9	11.3	5.92	6.29	739	581	24.1	31.2	851	920	1209	899
	177	425	61.4	76.6	805	506	2540	2300	95	101	38	54.5	3095	3281	72.7	79.8	7.96	8.45	40.1	27.6	5.6	11.7	3.13	6.6	523	531	14.6	15.3	702	655	1024	766
	198	411	73.2	72.1	665	474	2737	2561	98.5	94	34.9	45.3	4048	4246	85.6	76.5	10.4	16.3	39	40.9	8.36	10.1	3.39	2.62	716	574	15.5	6.8	663	540	899	1061
													3439	3045	78.2	86	12	5.53	40.7	32.3	9.75	9.43	6.46	8.65	671	562	23.1	15.7	796	683	850	834
													3289	4039	78.6	81.5	7.76	9.78	19.3	45	8.96	17.4	7.59	4.03	563	521	16.6	12	634	559	837	853
													5304	4682	86.3	86.4	10	11.1	48.9	43.7		10.4		3.78		687		10.8		681		992
													5019	4983	91	84.9	9.26	10.8	32.5	36.9		13.4		7.27		735		27.1		807		918
													4830	4010	88.9	90.4	10.1	10.8	34.7	42.4		14.9		2.56		519		22.9		744		947
													4390	5266	94	90.4	9.17	9.69	38.9	37.1
													3944	5019	96.1	93.9	4.66	12.6	47	54.3
													3700	4266	96.4	95
S4C	scLN													mLN
	CD28		Helios %		CD25		CTLA-4		CD122		TGF-bR %			CD28		Helios %		CD25		CTLA-4		CD122		TGF-bR %
	het (+/-)	ko (-/-)	het (+/-)	ko (-/-)	het (+/-)	ko (-/-)	het (+/-)	ko (-/-)	het (+/-)	ko (-/-)	het (+/-)	ko (-/-)		het (+/-)	ko (-/-)	het (+/-)	ko (-/-)	het (+/-)	ko (-/-)	het (+/-)	ko (-/-)	het (+/-)	ko (-/-)	het (+/-)	ko (-/-)
	402	377	73.9	75.3	3232	2288	87.6	311	68.9	76.5	2.28	2.01		447	455	62.6	78	2741	2708	106	301	65.7	75.5	0.871	3.91
	457	360	70.6	72.3	2929	1870	106	259	96.4	72.9	1.07	1.25		434	339	63.8	78.2	2142	2455	97	277	66.7	64.2	0.643	1.59
	333	288	58	70.2	3099	2030	95	300	68.9	75.5	1.63	1.38		495	280	62.2	76.4	2271	2367	109	279	62	62.7	0.454	1.9
	404	397	74.2	74.6	3130	2116	112	272	74	71.9	6.21	0.863		546	281	67.7	77.4	2299	2721	133	320	61	69.4	1.31	2.01
	383	328	70.5	75.7	2908	2249	107	256	71.7	75.2	1.31	1.63		483	335	67	75.8	2701	2830	120	311	76.5	69.7	1.17	2.23

[truncated: 2 more sheets: Fig S5, Fig S6]
